# Supplementary material
Source: publisher figshare collection journal article supplement (https://tandf.figshare.com/ndownloader/files/37564360)
Supplement: Supplementary file 1 [file 37564360]

**Supporting Information**

**Fabrication of Semi-Transparent SrTaO2N Photoanodes with a GaN Underlayer Grown via Atomic Layer Deposition**

Can Lua, Nathan J. O´Brienb, Polla Roufb, Richard Dronskowskia,c, Henrik Pedersen*b and Adam Slabon*d

*aInstitute of Inorganic Chemistry, RWTH Aachen University, Aachen, Germany;*

*bDepartment of Physics, Chemistry and Biology, Linköping University, Linköping, Sweden;*

*cHoffmann Institute of Advanced Materials, Shenzhen Polytechnic, Shenzhen, China;*

*dChair of Inorganic Chemistry, University of Wuppertal, Wuppertal, Germany*

*Corresponding authors E-mails: slabon@uni-wuppertal.de; henrik.pedersen@liu.se


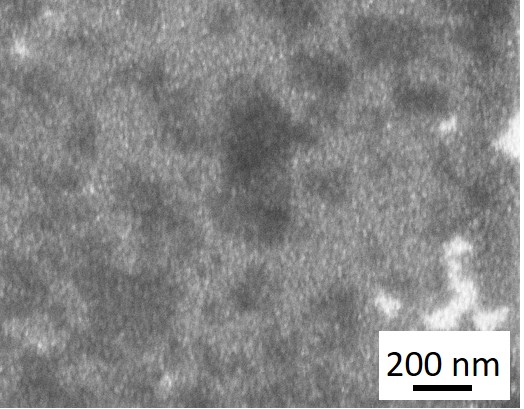


**Figure S1.** SEM image of 60 nm GaN/SiC.


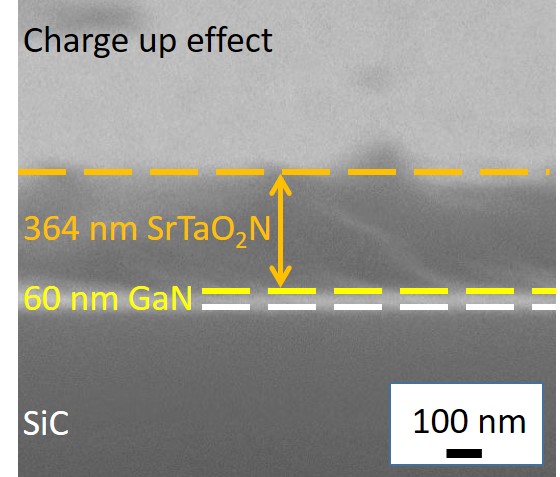


**Figure S2.** Cross-sectional SEM image of SrTaO2N/60 nm GaN/SiC.


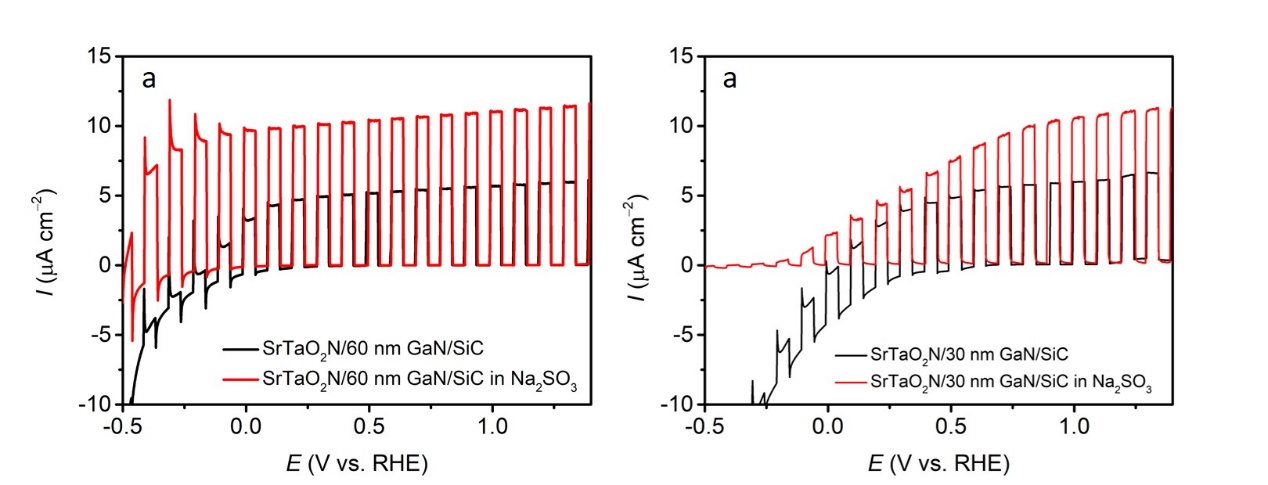


**Figure S3.** LSV curves of (a) SrTaO2N/60 nm GaN/SiC and (b) SrTaO2N/30 nm GaN/SiC measured in electrolyte with (red curves) and without (dark curves) Na2SO3 scavenger.


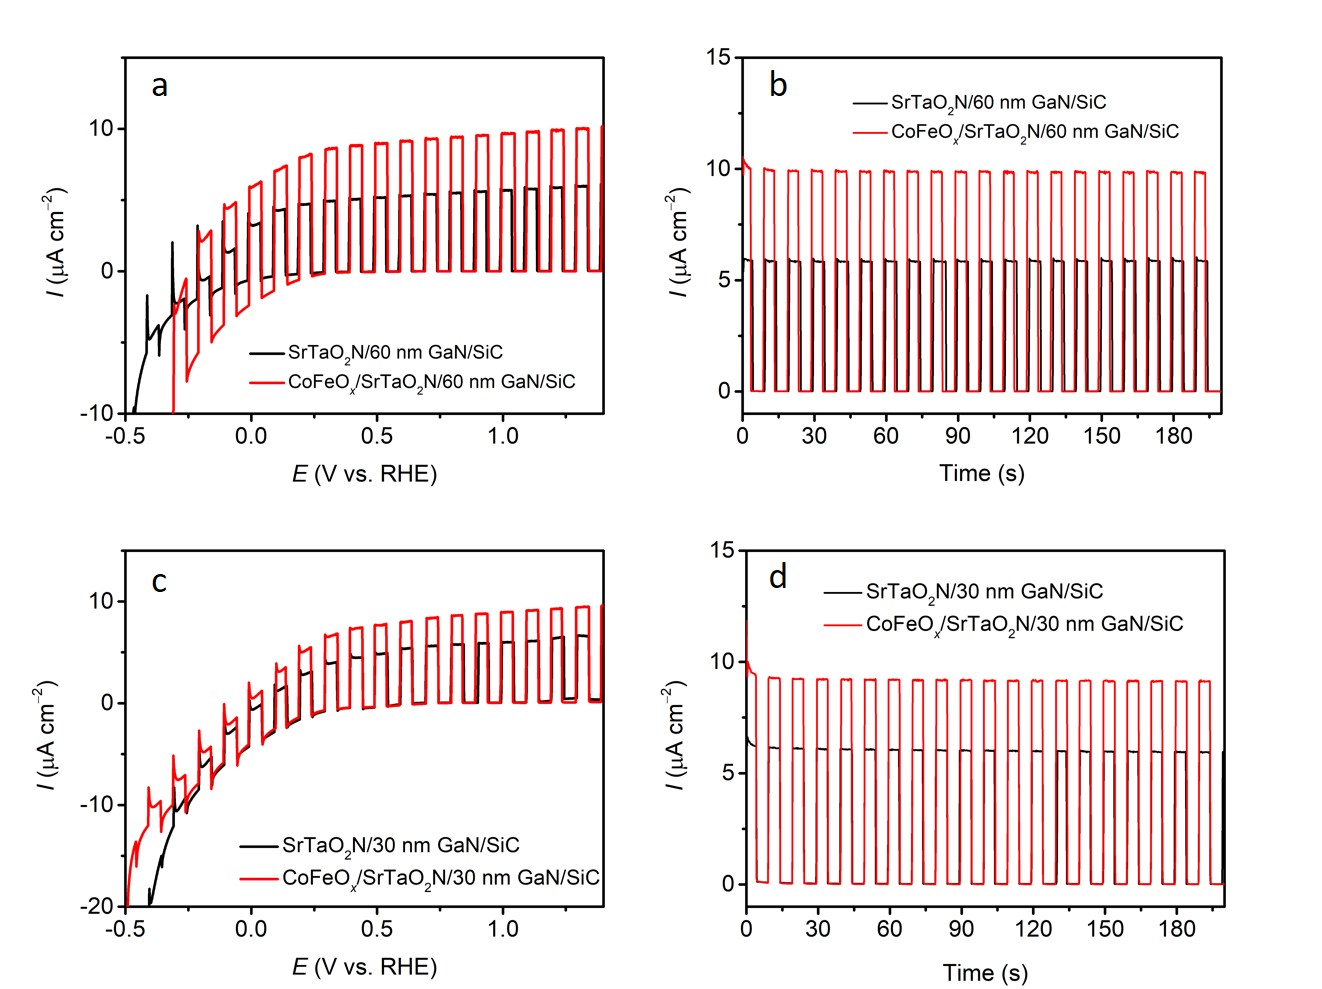


**Figure S4.** (a) LSV and (b) CA curves at 1.23 V vs. reversible hydrogen electrode (VRHE) of SrTaO2N/60 nm GaN/SiC and CoFeO*x*/SrTaO2N/60 nm GaN/SiC. (c) LSV and (d) CA curves at 1.23 VRHE of SrTaO2N/30 nm GaN/SiC and CoFeO*x*/SrTaO2N/30 nm GaN/SiC.
